# Supplementary material for: BMI Alterations and Prevalence of Overweight and Obesity Related to Service Duration at the German Armed Forces
Source: MDPI journal article supplement (doi:10.3390/healthcare11020225), 2023-01-11
Supplement: s1 [file s1]

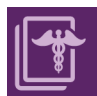

**Table S1.** Body mass index (BMI kg/m<sup>2</sup>) at the entry to the military service for both sexes and in the years from 2010 to 2022 (Median and IQR: 25%-75%).

| year     | <i>n</i> | <i>Median</i> | 25%  | 75%  |
|----------|----------|---------------|------|------|
| 2010     | 32,243   | 23.4          | 21.5 | 25.8 |
| 2011     | 13,030   | 23.5          | 21.5 | 25.8 |
| 2012     | 6365     | 23.5          | 21.6 | 25.7 |
| 2013     | 6010     | 23.4          | 21.6 | 25.7 |
| 2014     | 5958     | 23.4          | 21.5 | 25.7 |
| 2015     | 5325     | 23.5          | 21.5 | 25.8 |
| 2016     | 6156     | 23.5          | 21.5 | 25.8 |
| 2017     | 4418     | 23.2          | 21.3 | 25.7 |
| 2018     | 2488     | 23.5          | 21.4 | 25.8 |
| 2019     | 1523     | 23.4          | 21.3 | 26.1 |
| 2020     | 773      | 23.6          | 21.4 | 26.6 |
| 2021     | 629      | 23.9          | 21.6 | 26.6 |
| 2022     | 126      | 23.8          | 20.8 | 26.9 |
| total    | 85,044   |               |      |      |
| misssing | 35       | 23.5          | 21.5 | 25.8 |
